# Supplementary material for: Reinforcement, Dopamine and Rodent Models in Drug Development for ADHD
Source: PubMed Central journal article supplement (PMC3441939; doi:10.1007/s13311-012-0132-y), 2012-07-18
Supplement: 13311_2012_132_MOESM1_ESM.pdf [file 13311_2012_132_MOESM1_ESM.pdf]

To view the full contents of this document, you need a later version of the PDF viewer. You can upgrade to the latest version of Adobe Reader from [www.adobe.com/products/acrobat/readstep2.html](http://www.adobe.com/products/acrobat/readstep2.html)

For further support, go to [www.adobe.com/support/products/acrreader.html](http://www.adobe.com/support/products/acrreader.html)
